# Supplementary material
Source: Research Square preprint supplement (doi:10.21203/rs.3.rs-9206438/v1)
Supplement: Supplementary file 1 [file e904d2e8b803fc8619cb12a5.docx]

Supplemental table 1. Baseline characteristics of patients in different centers.

|  | | **Centers** | | |  |
| --- | --- | --- | --- | --- | --- |
| **Characteristic** | **Overall**, N = 11,290 (12,618)1,2 | SAHZU, N = 9,715 (10,923)1,2 | FAHGMU, N = 780 (864)1,2 | FAHXMU, N = 795 (831)1,2 | **P Value**3 |
| **Sex** |  |  |  |  | **0.003** |
| *Male* | 6,834 (61%) | 5,903 (61%) | 430 (55%) | 501 (63%) |  |
| *Female* | 4,456 (39%) | 3,812 (39%) | 350 (45%) | 294 (37%) |  |
| **Age (year)** | 50 [40, 59] | 49 [39, 58] | 58 [50, 67] | 55 [49, 64] | **<0.001** |
| **Classes** |  |  |  |  | **<0.001** |
| *Control* | 8,441 (75%) | 7,519 (77%) | 488 (63%) | 434 (55%) |  |
| *Phenocopy* | 1,405 (12%) | 1,031 (11%) | 174 (22%) | 200 (25%) |  |
| *Septal HCM* | 1,291 (11%) | 1,051 (11%) | 103 (13%) | 137 (17%) |  |
| *Apical HCM* | 153 (1.4%) | 114 (1.2%) | 15 (1.9%) | 24 (3.0%) |  |
| **T-wave axis (degrees)** | 45 [29, 61] | 45 [30, 61] | 48 [28, 66] | 36 [16, 59] | **<0.001** |
| **P-wave axis (degrees)** | 57 [30, 73] | 60 [30, 76] | 54 [39, 65] | 44 [30, 58] | **<0.001** |
| **QTc interval (ms)** | 410 [392, 429] | 407 [389, 425] | 423 [409, 438] | 433 [416, 456] | **<0.001** |
| **SV1 (mV)** | 0.80 [0.54, 1.12] | 0.80 [0.54, 1.12] | 0.78 [0.54, 1.09] | 0.71 [0.45, 1.11] | **<0.001** |
| **RV5 (mV)** | 1.48 [1.13, 1.95] | 1.51 [1.16, 1.96] | 1.36 [1.03, 1.84] | 1.22 [0.91, 1.73] | **<0.001** |
| **T-wave duration (ms)** | 186 [168, 210] | 182 [164, 204] | 346 [327, 365] | 196 [178, 212] | **<0.001** |
| **P-wave duration (ms)** | 98 [92, 106] | 100 [94, 106] | 52 [49, 57] | 100 [92, 104] | **<0.001** |
| **QRS duration (ms)** | 92 [86, 100] | 92 [86, 100] | 90 [82, 98] | 92 [86, 102] | **<0.001** |
| **R-wave axis (degrees)** | 50 [20, 70] | 53 [24, 71] | 42 [12, 64] | 26 [5, 50] | **<0.001** |
| **QRS axis (degrees)** | 48 [14, 69] | 53 [24, 71] | 12 [11, 13] | 26 [5, 50] | **<0.001** |
| **QT interval (ms)** | 376 [356, 402] | 372 [352, 394] | 435 [419, 454] | 392 [372, 416] | **<0.001** |
| **PR interval (ms)** | 156 [142, 170] | 154 [142, 170] | 158 [144, 174] | 160 [144, 176] | **<0.001** |
| **RV5+SV1 (mV)** | 2.31 [1.81, 2.95] | 2.33 [1.84, 2.96] | 2.17 [1.68, 2.88] | 2.03 [1.49, 2.71] | **<0.001** |
| **QRS–T angle (degrees)** | 27 [13, 51] | 26 [12, 50] | 37 [21, 56] | 24 [10, 54] | **<0.001** |
| 1median [IQR] for continuous; n (%) for categorical | | | | | |
| 2N represents the total number of patients, and the number in parentheses represents the number of ECGs | | | | | |
| 3Pearson's Chi-squared test; Kruskal-Wallis rank sum test | | | | | |
| Abbreviations: SAHZU, the Second Affiliated Hospital of Zhejiang University School of Medicine; FAHGMU, the First Affiliated Hospital of Guangxi Medical University; FAHXMU, the First Affiliated Hospital of Xinjiang Medical University | | | | | |
